# Supplementary material for: Comparative genomics of gene-family size in closely related bacteria
Source: Springer Nature journal article supplement (doi:10.1186/gb-2004-5-4-r27), 2004-03-18
Supplement: Additional file 3 [file gb-2004-5-4-r27-s3.doc]

Legends for additional data file figures

Additional data file 1

{was Figure 7}

The number of paralogs and the percentage of paralogous genes in the different-sized gene families in *Pirelulla* sp. compared to other large-sized genomes.

Additional data file 2

{was Figure 8}

Gene family sizes in intracellular genomes that have undergone reductive evolution compared to related free-living sequenced organisms. A: The intracellular parasite *Rickettsia prowazekii* vs the free-living alpha-proteobacterium *Caulobacter crescentus*. B: The intracellular symbiont *Buchnera aphidicola* vs the free-living gamma-proteobacterium *Escherichia coli* K12. Orthologous genes in the genome pairs (identified by BLASTp at a level of 40% amino acid identity over 60% of the length) are displayed in arbitrary order and plotted against the number of homologs in their own genome (i.e. paralogs). Only protein-coding genes are included. Values of zero on the y-axis indicate single-copy genes.
