# Supplementary figures and images for: Comparative genomics of gene-family size in closely related bacteria
Source: Springer Nature journal article supplement (doi:10.1186/gb-2004-5-4-r27), 2004-03-18

**Figure 7**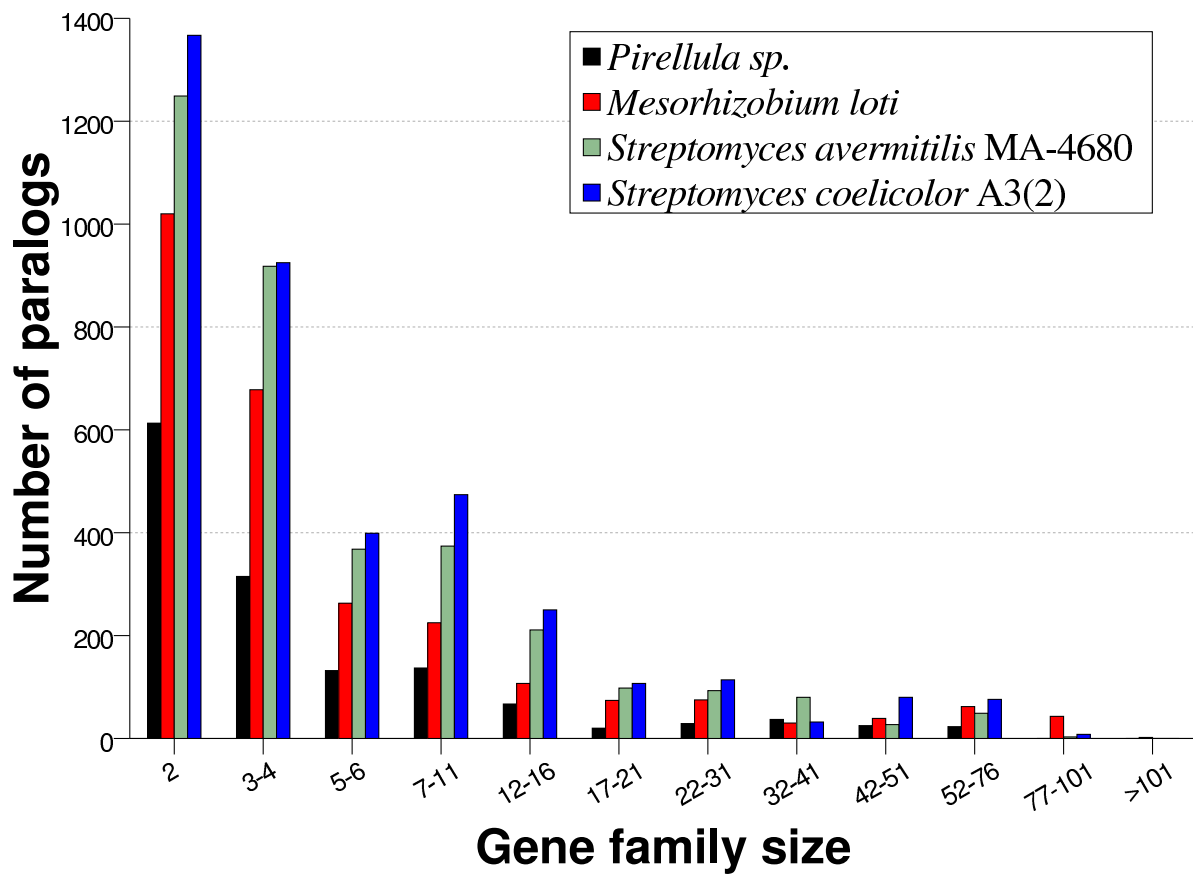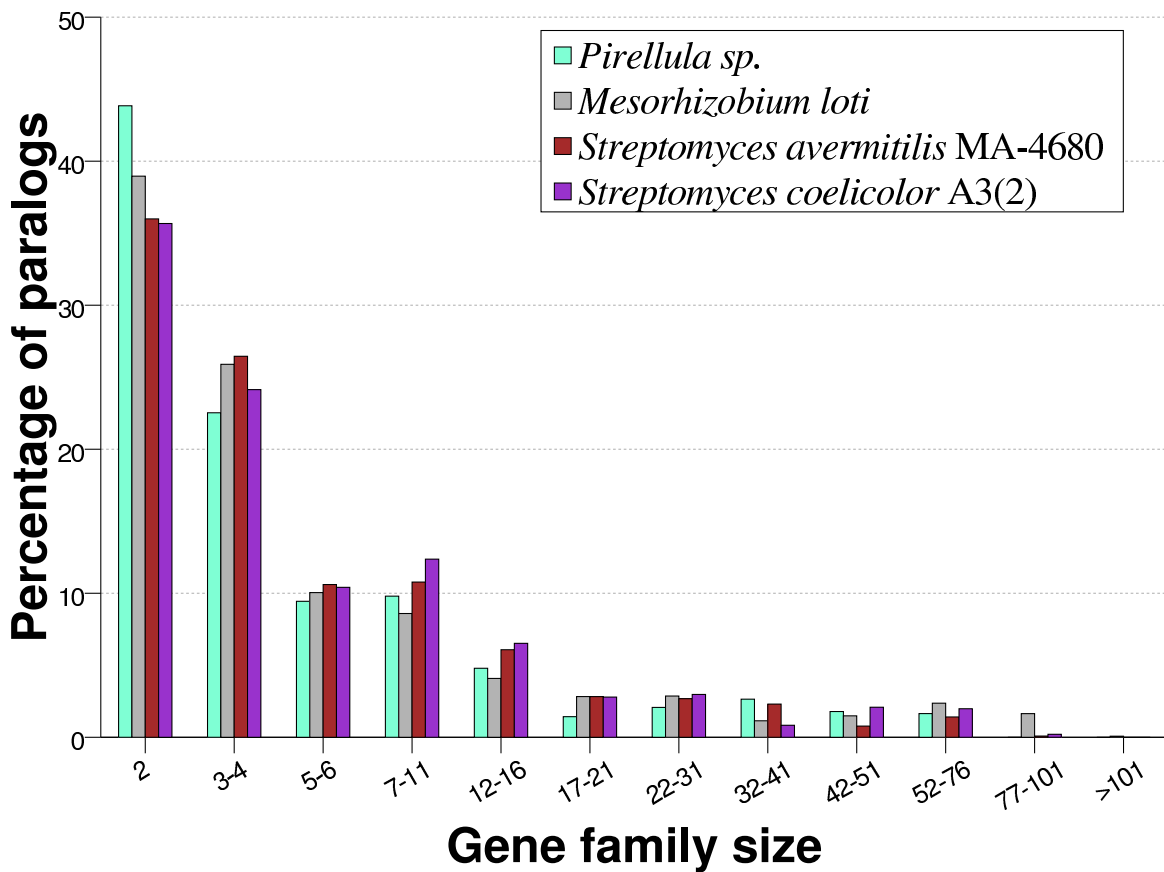

Supplement: Additional file 1 [file gb-2004-5-4-r27-s1.pdf]

Figure 8

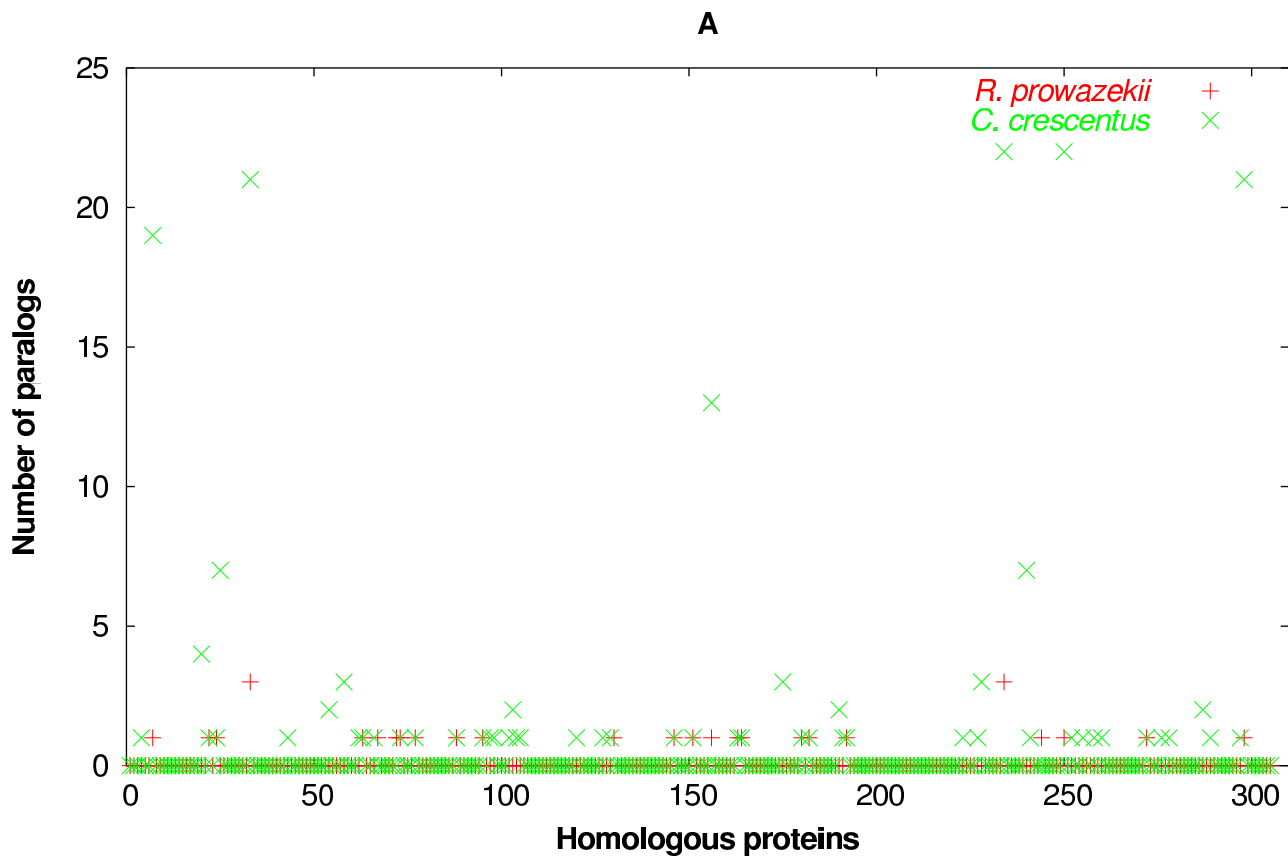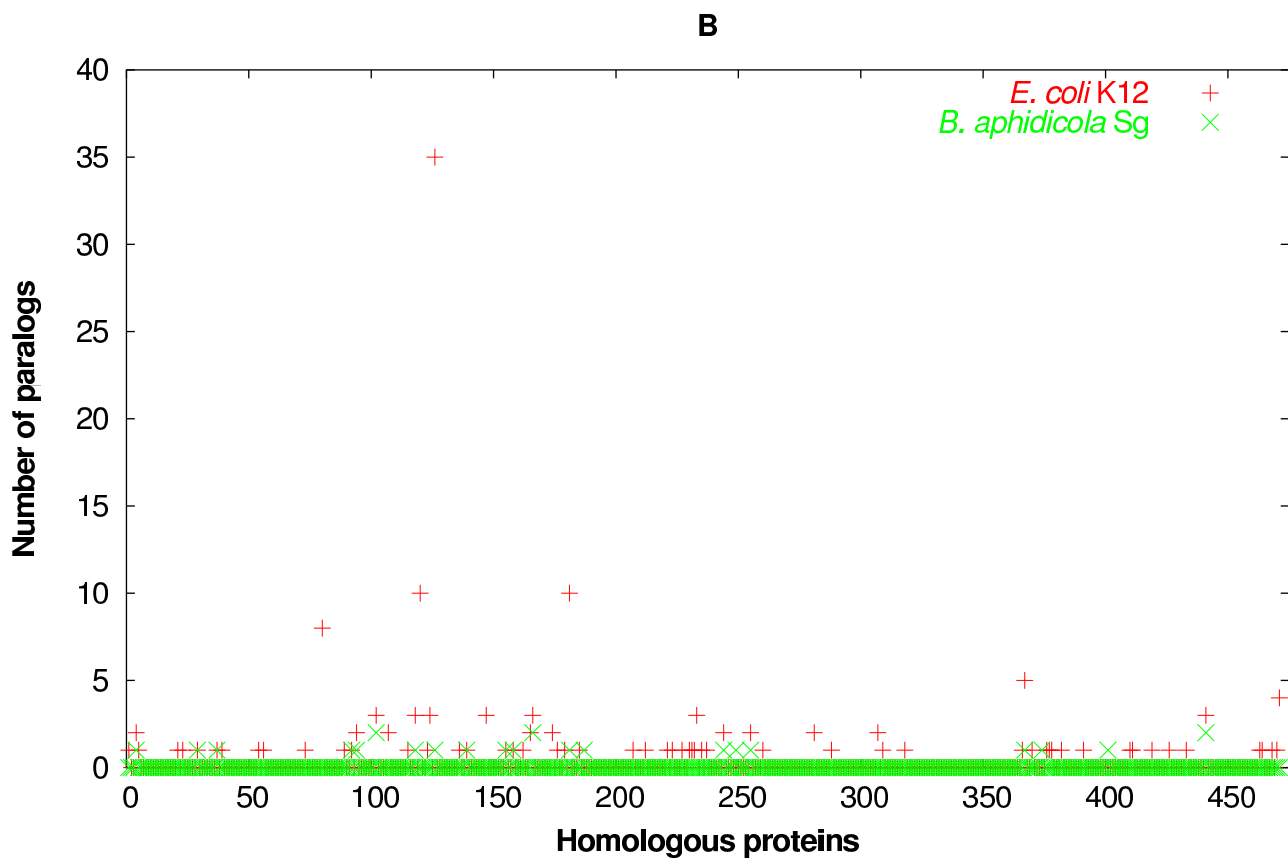

Supplement: Additional file 2 [file gb-2004-5-4-r27-s2.pdf]
